# Supplementary material
Source: publisher figshare collection journal article supplement (https://gsajournals.figshare.com/ndownloader/files/13390349)
Supplement: Supplementary file 1 [file 13390349]

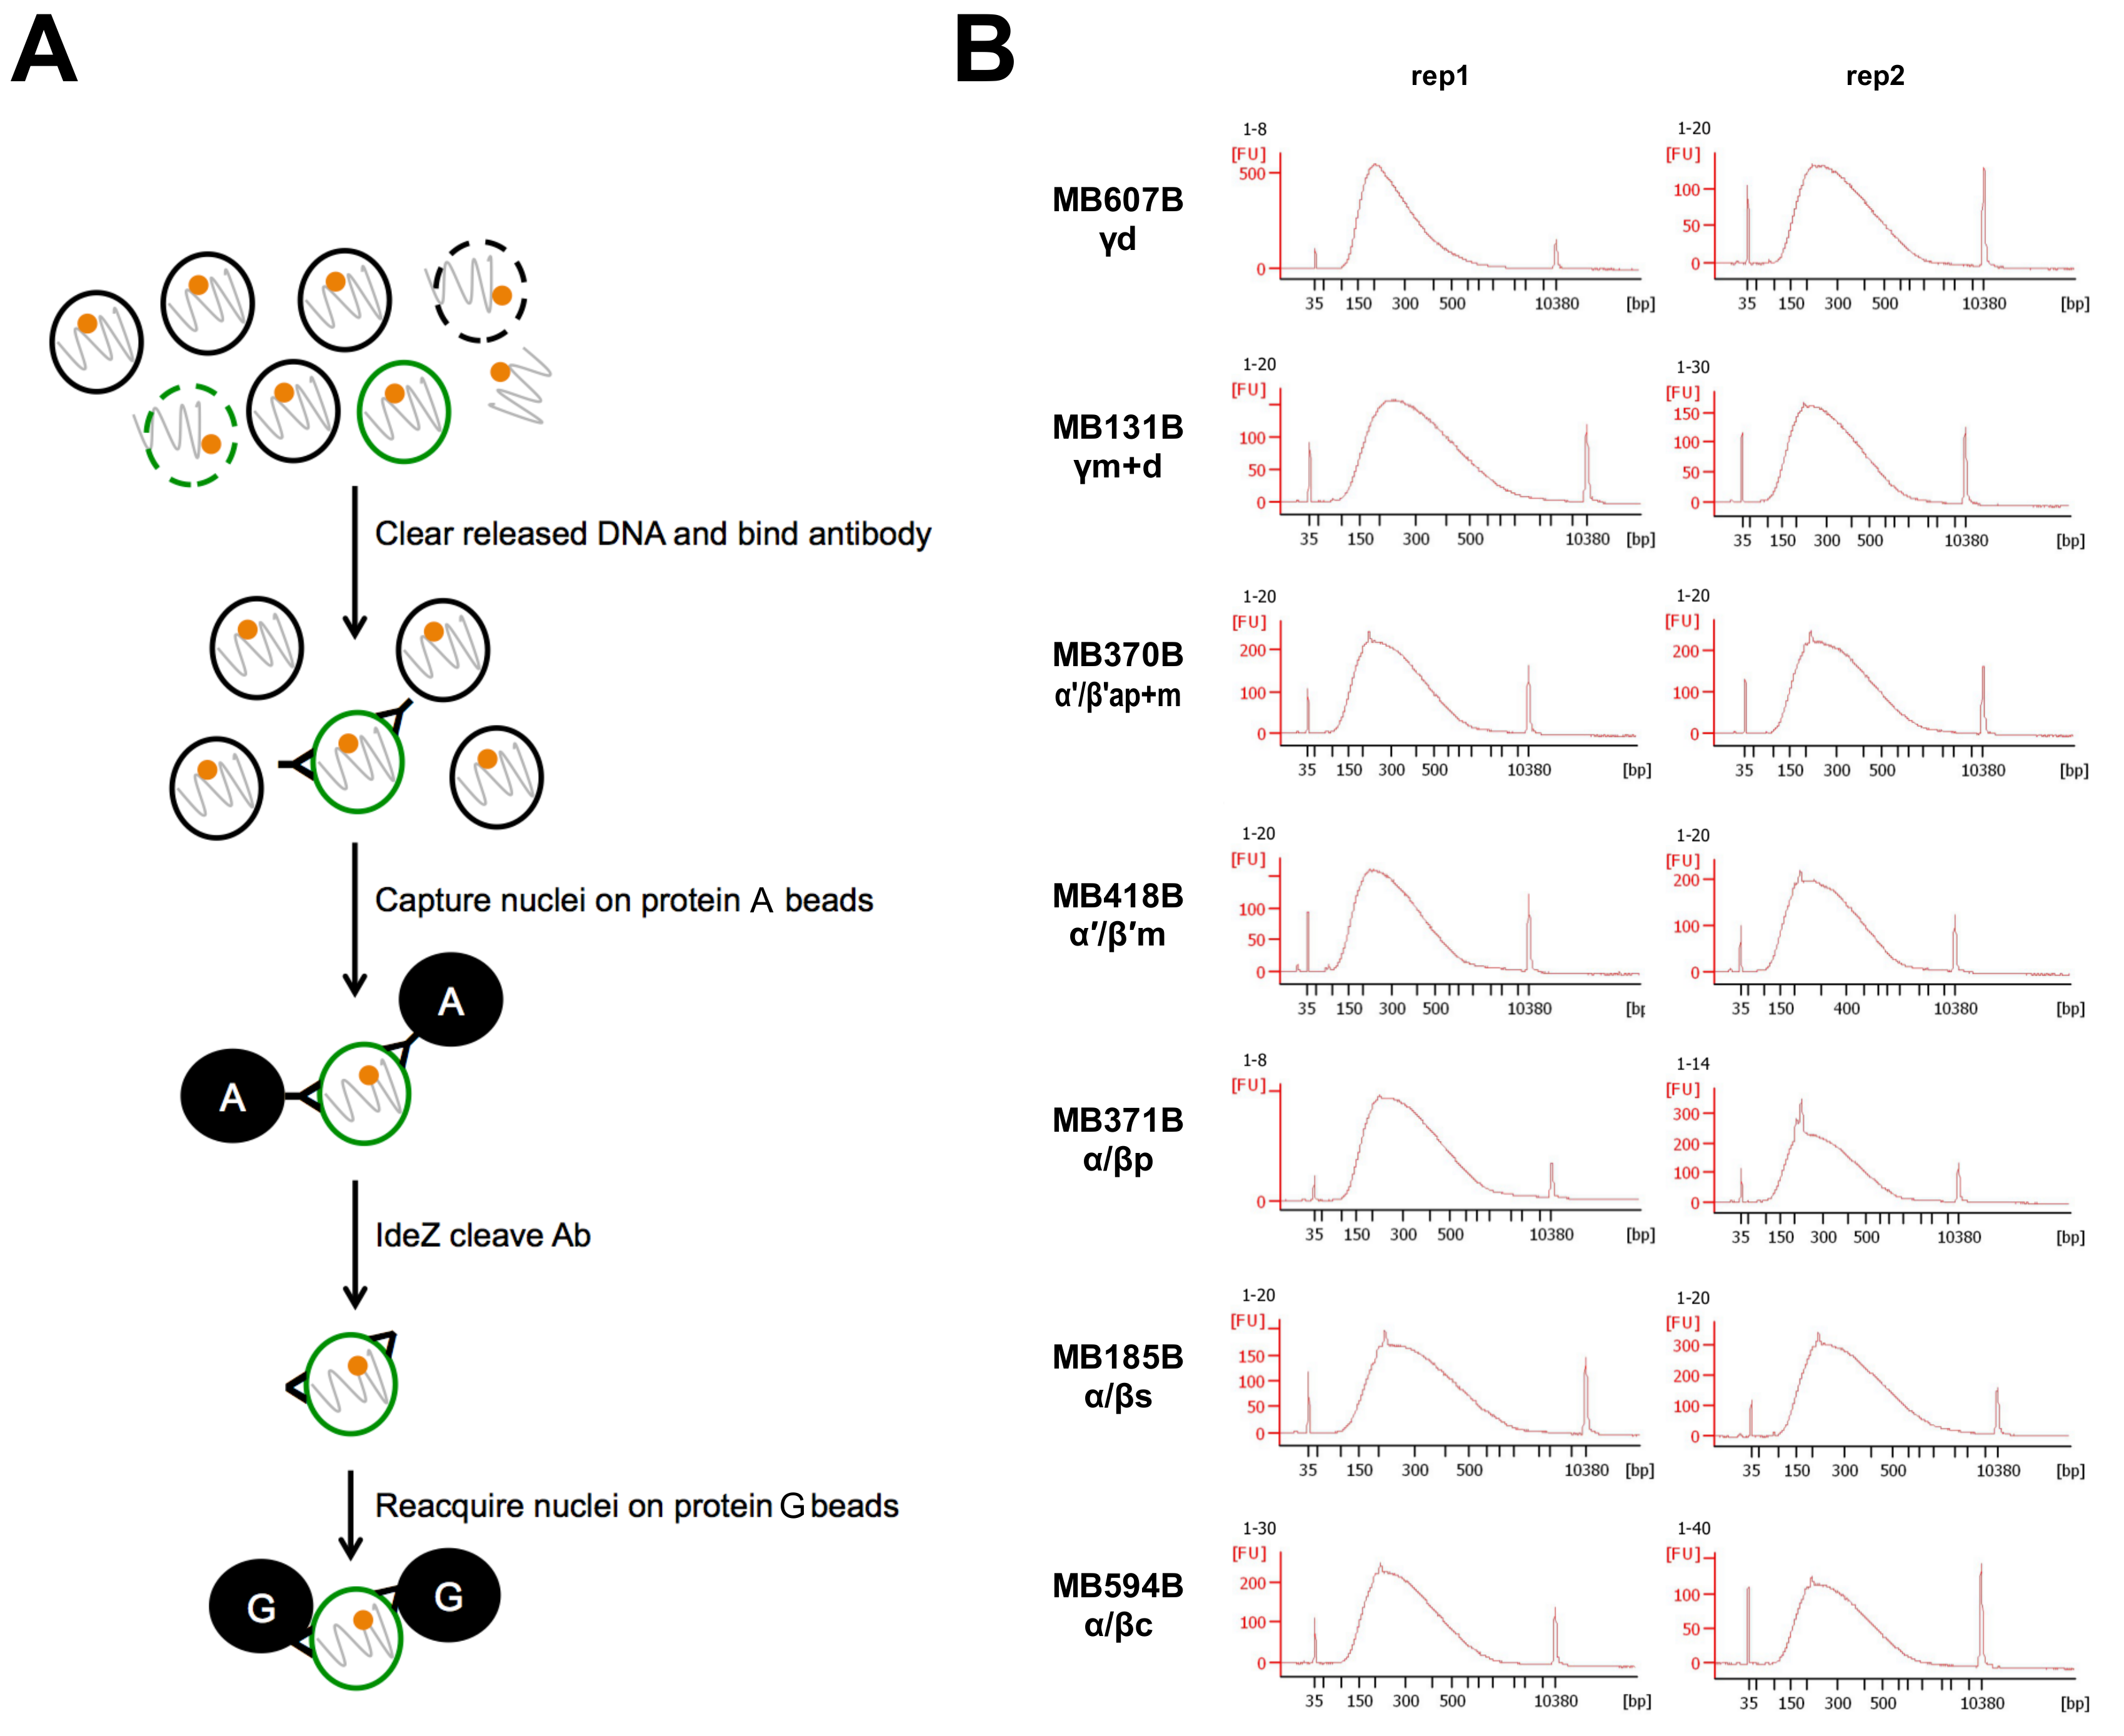


**Figure S2.** (A) Overview of the workflow of TAPIN purification of nuclei. (B) The molecular size distribution of amplified cDNA obtained from the 14 TAPIN-seq libraries.
